# Supplementary material for: Feasibility of a 4-week combined supervised and home-based exercise program for patients with nontuberculous mycobacterial pulmonary disease: A single-center, single-arm feasibility study
Source: Research Square preprint supplement (doi:10.21203/rs.3.rs-7645911/v1), 2025-10-12
Supplement: Supplementary file 1 [file 68f5681b3113acd5ea9e25dd.docx]

**Additional file 2.** Individual VO₂max test parameters during maximal exercise testing

| Variables | Baseline | | | 4 weeks | | |
| --- | --- | --- | --- | --- | --- | --- |
|  | RER | HR max (bpm) | RPE | RER | HR max (bpm) | RPE |
| Included participants |  |  |  |  |  |  |
| SSV-S01 | 1.01 | 170 | 13 | 1.11 | 171 | 17 |
| SSV-S05 | 1.04 | 160 | 20 | 0.92 | 156 | 17 |
| SSV-S06 | 1.1 | 180 | 20 | 1.13 | 179 | 19 |
| SSV-S07 | 1.11 | 171 | 16 | 1.15 | 173 | 17 |
| SSV-S12 | 1.13 | 173 | 17 | 1.09 | 178 | 17 |
| SSV-S13 | 1.14 | 158 | 17 | 1.22 | 163 | 19 |
| SSV-S19 | 1.03 | 185 | 18 | 1.17 | 188 | 18 |
| SSV-S20 | 1.22 | 173 | 19 | 1.23 | 178 | 20 |
| SSV-S22 | 1.01 | 172 | 19 | 1.09 | 175 | 19 |
| SSV-S23 | 0.89 | 164 | 15 | 0.91 | 157 | 19 |
| Excluded participants |  |  |  |  |  |  |
| SSV-S08 | 0.99 | 167 | 18 | 0.97 | 173 | 15 |
| SSV-S09 | 0.89 | 145 | 13 | 0.89 | 158 | 15 |
| SSV-S10 | 1.01 | 136 | 18 | 0.96 | 135 | 20 |
| SSV-S11 | 0.96 | 161 | 15 | 1.01 | 158 | 15 |
| SSV-S15 | 1.02 | 164 | 17 | 0.8 | 142 | 13 |
| SSV-S16 | 0.99 | 171 | 16 | 0.99 | 169 | 15 |
| SSV-S17 | 0.98 | 164 | 19 | 1.07 | 174 | 14 |
| SSV-S18 | 1.04 | 149 | 14 | 0.97 | 146 | 11 |

Individual values for respiratory exchange ratio, maximum heart rate, and rating of perceived exertion at baseline and 4-week maximal exercise testing. Participants were categorized according to the VO₂max validity criteria stated in the Methods section. Abbreviations: RER, respiratory exchange ratio; VO₂max, maximal oxygen uptake; RPE, rate of perceived exertion; HR max, maximum heart rate
