# Supplementary material for: Feasibility of a 4-week combined supervised and home-based exercise program for patients with nontuberculous mycobacterial pulmonary disease: A single-center, single-arm feasibility study
Source: Research Square preprint supplement (doi:10.21203/rs.3.rs-7645911/v1), 2025-10-12
Supplement: Supplementary file 2 [file ef2c4e3cfecc9127780eedd2.docx]

**Additional file 1.** Changes in cardiorespiratory fitness and VO₂max test parameters following a 4-week exercise intervention (n=10)

| Variable | Baseline | 4 weeks | *P* value |
| --- | --- | --- | --- |
| Cardiorespiratory fitness |  |  |  |
| VO₂max (mL/kg/min) | 29.60 (26.75−34.03) | 30.50 (27.48−38.73) | 0.507 |
| VO₂max test parameters |  |  |  |
| RER | 1.08 (1.02−1.13) | 1.12 (1.09−1.17) | 0.203 |
| HR max (bpm) | 171.5 (165.5−173.0) | 174.0 (165.0−178.0) | 0.333 |
| RPE | 17.5 (16.3−19.0) | 18.5 (17.0−19.0) | 0.272 |

Data are presented as median (25th−75th percentile). P-values were calculated using the Wilcoxon signed-rank test. Analysis included only participants meeting ≥2 of 3 VO₂max validity criteria established in Methods. Abbreviations: RER, respiratory exchange ratio; VO₂max, maximal oxygen uptake; RPE, rate of perceived exertion; HR max, maximum heart rate
